# Supplementary material for: Low-temperature molten salt synthesis and catalytic mechanism of CoS2/NC as an advanced bifunctional electrocatalyst
Source: Royal Society of Chemistry journal article supplement (doi:10.1039/d3dt01694c), 2023-01-01
Supplement: d3dt01694c1.pdf [file d3dt01694c1.pdf]

# Low-temperature molten salt synthesis and catalytic mechanism of CoS<sub>2</sub>/NC toward advanced bifunctional electrocatalyst

Yuankun Tu<sup>1</sup>, Chuanhua Li<sup>1,2,3</sup>\*, Yubao Shi<sup>1</sup>, Yu Jiang<sup>1</sup>, Wei Xiao<sup>1</sup>, Shenghua Zhu<sup>1,3</sup>,

Peng Lv<sup>3</sup>, Xuemin Yan<sup>1</sup>\*

<sup>1</sup> College of Chemistry and Environmental Engineering, Yangtze University,

Jingzhou, 434023 Hubei, PR China

<sup>2</sup> State Key Laboratory of Advanced Technology for Materials Synthesis and Processing, Wuhan University of Technology, Wuhan 430070, PR China

<sup>3</sup> State Key Laboratory of High-efficiency Utilization of Coal and Green Chemical Engineering, Ningxia University, Yinchuan 750021, PR China

\*Corresponding author

E-mail address: lichuanhuakg@126.com; xueminyan@126.com

## Electrochemical measurement

To obtain the catalyst ink, mixture of 1 mL of deionized water and isopropanol (in a 1 : 9 volume ratio) was used to disperse 5 mg of catalyst and 20  $\mu$ L of 5 wt% nafion solution. Then, 20  $\mu$ L of catalyst ink was applied to the surface of RDE (5 mm in diameter, 0.196 cm<sup>2</sup>) in three drops to dry naturally. The RDE electrode was loaded with 0.1 mg catalyst (0.5 mg cm<sup>-2</sup>). In contrast, Pt/C and IrO<sub>2</sub> catalyst inks were also prepared using the same process.

ORR tests were performed using the 0.1 M KOH solution with scan rate of 5 mV s<sup>-1</sup>. Measurements were taken for the samples at various rotational speeds (ranging from 400 to 2000 rpm), in -0.8 ~ 0.2 V (vs. Hg/HgO) within the range of linear scanning voltammetry (LSV) curves. The cyclic voltammetry (CV) measurements were scanned at 50 mV s<sup>-1</sup>. The current time chronoamperometric curves (I-T) was tested at -0.3 V (vs. Hg/HgO).

OER activity was studied using the 1 M KOH solution with LSV curves in the potential range of 0 ~ 1.0 V. The double-layer capacitance of the catalyst was estimated by CV measurements of the non-Faraday current region within potential window of 1.00 ~ 1.10 V. These tests were performed at scan rates of 20, 40, 60, 80, 100 and 120 mV s<sup>-1</sup>. Electrochemical impedance spectroscopy (EIS) measurements were carried out at 1.05 V vs. RHE in the frequency range of 10<sup>6</sup> Hz ~ 1 Hz with an AC voltage of 10 mV. The current time chronoamperometric curves (I-T) was tested at 0.6 V (vs. Hg/HgO).

The potentials reported in this study were calibrated with reference to the reversible hydrogen electrode (RHE) using the following equation:

$$E_{\text{vs.RHE}} = E_{\text{vs.Hg/HgO}} + 0.059 \text{ pH} + 0.098 \quad (1)$$

The overpotential value for OER was calculated using the following equations.

$$\eta(\text{V}) = E_{\text{vs.RHE}} - 1.23 \quad (2)$$

The electron transfer number (n) in ORR process is calculated by Koutecky-Levich (K-L) equations according to ORR polarization curves at different rotation speeds:<sup>1</sup>

$$i_d^{-1} = i_k^{-1} + i_{dl}^{-1} \quad (3)$$

$$i_k^{-1} = nFAkC_{O_2} \quad (4)$$

$$i_{dl}^{-1} = (0.62nFC_{O_2} D_{O_2}^{2/3} \nu^{-1/6})^{-1} \omega^{-1/2} \quad (5)$$

where  $i_d^{-1}$ ,  $i_k^{-1}$  and  $i_{dl}^{-1}$  represent the current density of disk, kinetic and diffusion-limiting. n, F and  $\omega$  is the abbreviation of overall electron transfer number per oxygen molecule, faraday constant (96485 C mol<sup>-1</sup>), rotating speed of disk electrode, respectively.  $C_{O_2}$ ,  $D_{O_2}$  and  $\nu$  are saturated oxygen concentration ( $1.2 \times 10^{-6}$  mol cm<sup>-3</sup>), diffusion coefficient of oxygen ( $1.9 \times 10^{-5}$  cm<sup>2</sup> s<sup>-1</sup>) and kinematic viscosity of the electrolyte (0.01 cm<sup>2</sup> s<sup>-1</sup>) in aqueous solution with 0.1 M KOH.

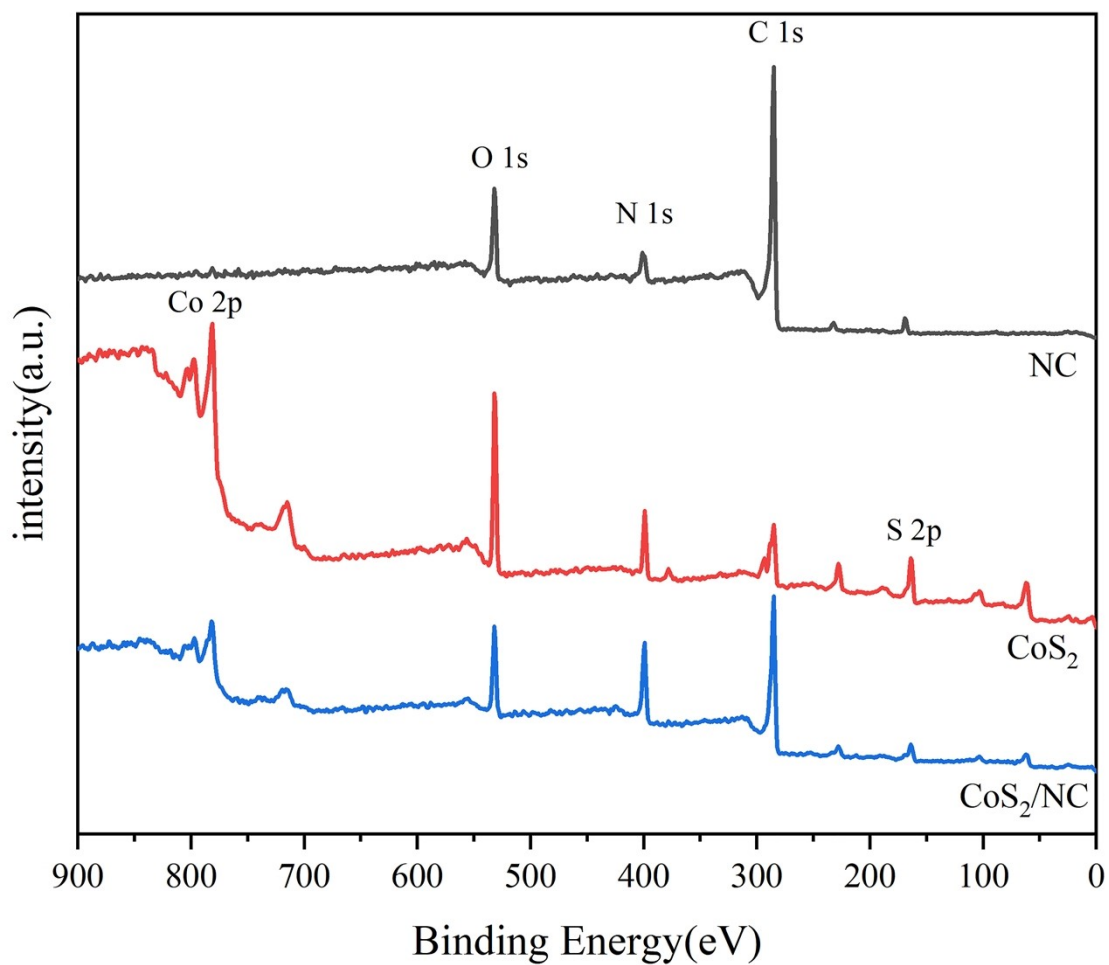

Fig.S1 Full XPS spectra of NC, CoS<sub>2</sub> and CoS<sub>2</sub>/NC.

Table S1 The proportion of different nitrogen species in the N1s XPS spectra.

| sample               | Pyridinic N<br>(At.%) | PyrrolicN<br>(At.%) | Graphitic N<br>(At.%) |
|----------------------|-----------------------|---------------------|-----------------------|
| NC                   | 21.14                 | 33.49               | 45.37                 |
| CoS <sub>2</sub> /NC | 32.38                 | 17.76               | 49.86                 |

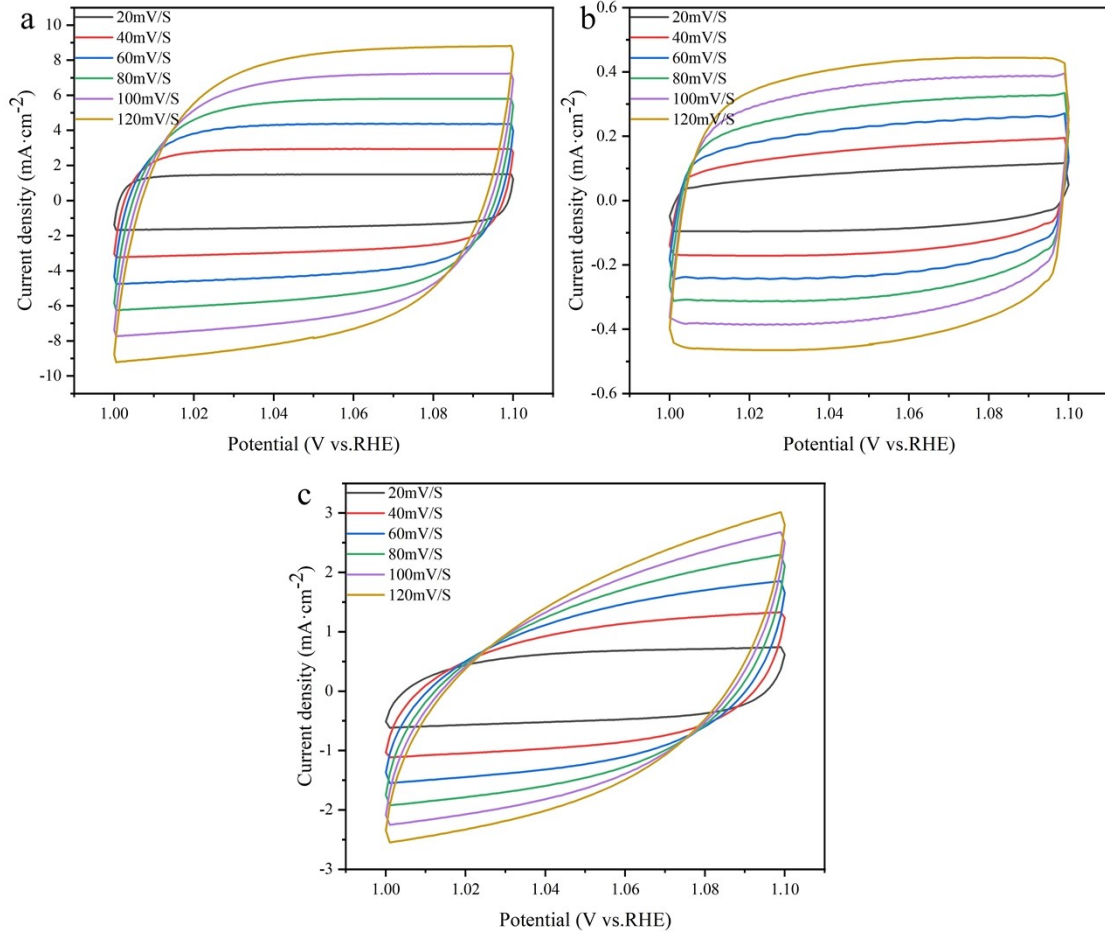

Fig.S2 CV curves for NC(a), CoS<sub>2</sub>(b) and CoS<sub>2</sub>/NC(c) catalysts at different scan rates of 20~120mV s<sup>-1</sup> in the potential range of 1.00~1.10 V (vs. RHE).

The electrochemical active surface area (ECSA) is measured via a double layer capacitance ( $C_{dl}$ ) method.<sup>2,3</sup> In the non-Faradaic potential region, the measured current via CV is attributed to double-layer charging current ( $i_c$ ), which is equal to the product of scan rate ( $v$ ) and double layer capacitance ( $C_{dl}$ ), as expressed by equation:

$$i_c = vC_{dl} \quad (6)$$

Thus, a plot of a series of “ $i$ ” voltammetry as a function of “ $v$ ” yields a straight line whose slope is  $C_{dl}$ . The electrochemical active area of the catalyst is calculated according to equation:

$$ECSA = C_{dl}/C_s \quad (7)$$

Where the  $C_s$  is the specific capacitance of planar surface. In this work, a typical  $C_s$  value of 0.040 mF cm<sup>-2</sup> in 1.0 M KOH solution is adopted for

the estimation of ECSA.<sup>4</sup>

For the determination of  $C_{dl}$ , CV curves were measured in a potential range of 1.00 ~ 1.10 V at scan rates of 20, 40, 60, 80, 100 and 120  $\text{mV s}^{-1}$ . The CV curves of NC,  $\text{CoS}_2$  and  $\text{CoS}_2/\text{NC}$  recorded at various scan rates are shown in Fig. S2. The anodic currents ( $i_a$ ) and cathodic currents ( $i_c$ ) at 1.05 V were extracted for further analysis.  $C_{dl}$  was then obtained by plotting  $i$ ,  $0.5(i_a - i_c)$ , as a function of scan rate, and the results were shown in Fig. 6c. The  $C_{dl}$  of NC,  $\text{CoS}_2$  and  $\text{CoS}_2/\text{NC}$  are determined to be 12.894, 0.667 and 2.296 mF, respectively. Accordingly, the ECSA is calculated to be 322.35  $\text{cm}^2$  for NC, 16.68  $\text{cm}^2$  for  $\text{CoS}_2$ , and 57.4  $\text{cm}^2$  for  $\text{CoS}_2/\text{NC}$ .

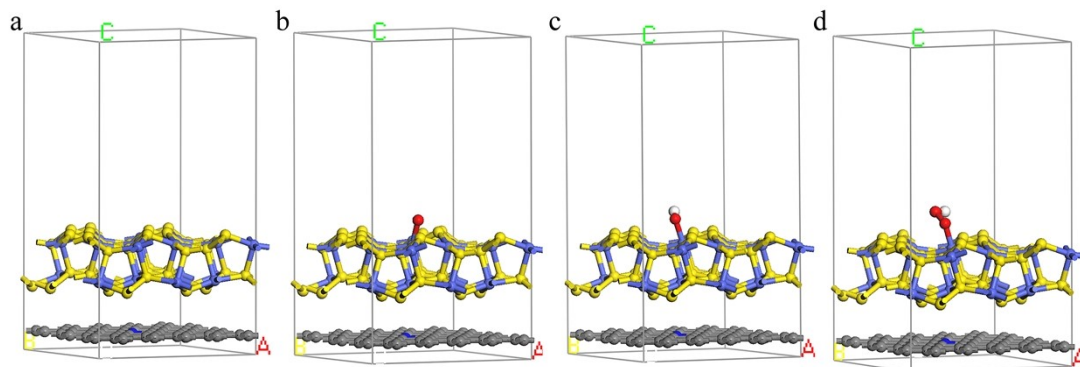

Fig.S3 The atomic models of \*(a), O\*(b), OH\*(c) and OOH\*(d) intermediates adsorbed on CoS<sub>2</sub>/NC catalysts after geometry optimization.

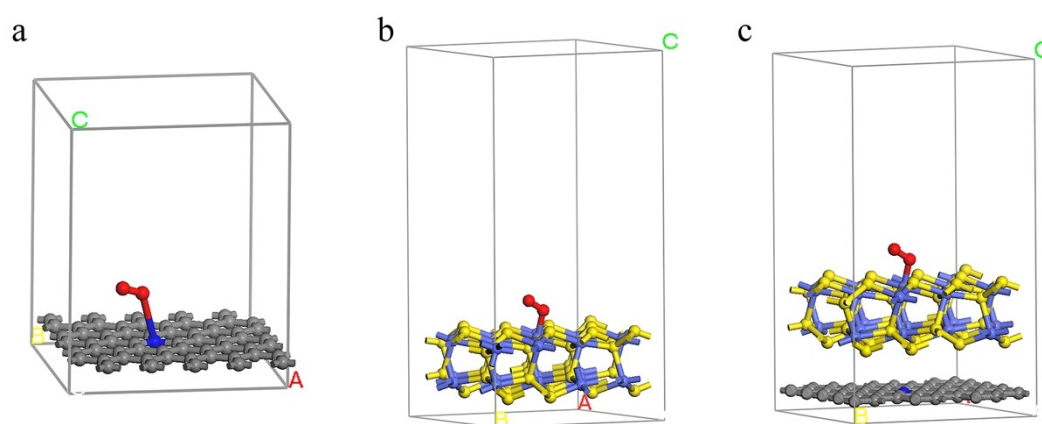

Fig.S4 The atomic models of O<sub>2</sub> adsorbed on (a) NC, (b) CoS<sub>2</sub>(001) and (c) CoS<sub>2</sub>/NC after geometry optimization.

The free energy changes for all elementary reactions in ORR are calculated according to simulated atomic model of NC, CoS<sub>2</sub> and CoS<sub>2</sub>/NC. The ORR elementary reaction of 4-electron reaction pathway in an alkaline electrolyte is thought as follows:<sup>5</sup>

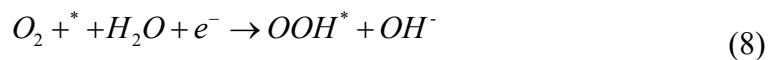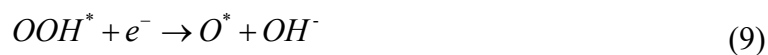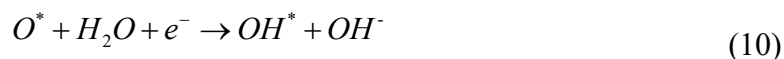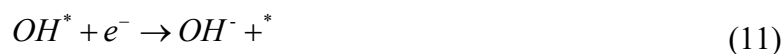

where \* represents bare catalyst. O\*, OH\* and OOH\* represent that catalyst adsorbs intermediate products, such as OOH, O, and OH, respectively. The oxygen

evolution reaction (OER) is the reverse reaction of the oxygen reduction reaction (ORR), and the OER process that occurs according to four electrons is shown below:

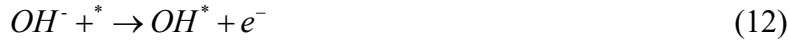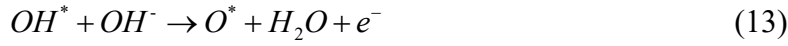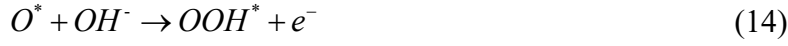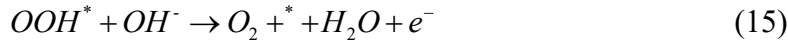

For all elementary reactions in ORR and OER, the free energy change is defined as follows:

$$\Delta G = \Delta E_{DFT} + \Delta ZPE - T\Delta S + \Delta G_{pH} - eU \quad (16)$$

where  $\Delta E_{DFT}$ ,  $\Delta ZPE$  and  $\Delta S$  represent the difference of total energy, zero-point energy, and entropy between products and reactants for all elementary reactions. For ORR, the value of  $\Delta G_{pH}$  is 0.769 eV at pH = 13 according to  $\Delta G_{pH} = -k_B T \ln[H^+]$ . U and e are the electrode potential and transferred charge, respectively. The overpotential of ORR is given by following equations (at U=0 V).

$G^{ORR} = \max\{\Delta G_1, \Delta G_2, \Delta G_3, \Delta G_4\}$ , where  $\Delta G_1$ ,  $\Delta G_2$ ,  $\Delta G_3$ , and  $\Delta G_4$  are calculated according to elementary reaction (8) - (11).

$$\eta^{ORR} = G^{ORR}/e + 0.461 \text{ V} \quad (17)$$

In similar way, the value of  $\Delta G_{pH}$  is 0.828 eV at pH = 14. The overpotential of OER is given by following equations (at U=0 V)

$G^{OER} = \max\{\Delta G_5, \Delta G_6, \Delta G_7, \Delta G_8\}$ , where  $\Delta G_5$ ,  $\Delta G_6$ ,  $\Delta G_7$ , and  $\Delta G_8$  are calculated according to elementary reaction (12) - (15).

$$\eta^{OER} = G^{OER}/e - 0.402 \text{ V} \quad (18)$$

In addition, the oxygen adsorption energy of NC, CoS<sub>2</sub> and CoS<sub>2</sub>/NC is given by following equations.

$$E_{ads-O_2} = E_{O_2/slab} - E_{slab} - E_{O_2} \quad (19)$$

Table S2 Catalytic performance comparison of CoS<sub>2</sub>/NC with the recently reported CoS<sub>2</sub> and carbon based ORR catalysts

| Catalysts                                            | E <sub>1/2</sub> (V) | Reference |
|------------------------------------------------------|----------------------|-----------|
| CoS <sub>2</sub> /NSCNTs                             | 0.80                 | 6         |
| CoO/CoS <sub>2</sub>                                 | 0.78                 | 7         |
| Co-CoO <sub>x</sub> /Co-N-C                          | 0.81                 | 8         |
| CoS <sub>2</sub> /NSC-MC                             | 0.84                 | 9         |
| CoS <sub>2</sub> @MoS <sub>2</sub> @NiS <sub>2</sub> | 0.80                 | 10        |
| FeS <sub>2</sub> -CoS <sub>2</sub> /NCFs             | 0.81                 | 11        |
| CNT-CoS <sub>2</sub> -Fe/NC                          | 0.80                 | 12        |
| LiET-CoS <sub>2</sub>                                | 0.82                 | 13        |
| Fe-SAC/NC                                            | 0.84                 | 14        |
| Fe@FeSA-N-C-900                                      | 0.83                 | 15        |
| CoS <sub>2</sub> @NC-400                             | 0.82                 | 16        |
| The N,P/CoS <sub>2</sub> @TiO <sub>2</sub> NPFs      | 0.81                 | 17        |
| CoS <sub>2</sub> /NC                                 | 0.85                 | This work |

Table S3 Catalytic performance comparison of CoS<sub>2</sub>/NC with the recently reported CoS<sub>2</sub> and carbon based OER catalysts

| Catalysts                                       | η <sub>10</sub> (mV) | Reference |
|-------------------------------------------------|----------------------|-----------|
| FeS <sub>2</sub> /CoS <sub>2</sub> /NSCNTs      | 225                  | 6         |
| CoS <sub>2</sub> /NCFs                          | 400                  | 11        |
| The N,P/CoS <sub>2</sub> @TiO <sub>2</sub> NPFs | 260                  | 17        |
| NC/CoS <sub>2</sub>                             | 380                  | 18        |
| CoS <sub>2</sub> -C@MoS <sub>2</sub> -25        | 390                  | 19        |
| CoS <sub>2</sub> @BP-COP                        | 270                  | 20        |
| CoS <sub>2</sub>                                | 310                  | 21        |
| CoS <sub>2</sub> /NSG                           | 393                  | 22        |
| N-doped CoS <sub>2</sub>                        | 290                  | 23        |
| Co-N-C-TET                                      | 280                  | 24        |
| CoS <sub>2</sub> /CNT composites                | 290                  | 25        |
| EG/CoS <sub>2</sub> -NC                         | 335                  | 26        |
| CoS <sub>2</sub> /NC                            | 220                  | This work |



## References

1. J. Sunarso, A. A. Torriero, W. Zhou, P. C. Howlett and M. Forsyth, *The Journal of Physical Chemistry C*, 2012, **116**, 5827-5834.
2. C. C. McCrory, S. Jung, J. C. Peters and T. F. Jaramillo, *Journal of the American Chemical Society*, 2013, **135**, 16977-16987.
3. H. Wang, X. Xiao, S. Liu, C.-L. Chiang, X. Kuai, C.-K. Peng, Y.-C. Lin, X. Meng, J. Zhao and J. Choi, *Journal of the American Chemical Society*, 2019, **141**, 18578-18584.
4. Y. Ge, Y. Wu, L. Ma, X. J. Li, M. Román, R. R. Chianelli, B. Torres and D. Villagrán, *International Journal of Hydrogen Energy*, 2022, **47**, 27839-27847.
5. Z. Meng, S. Cai, R. Wang, H. Tang, S. Song and P. Tsiakaras, *Applied Catalysis B: Environmental*, 2019, **244**, 120-127.
6. K. W. Han, P. Dai, Y. Yang and M. Z. Wu, *Materials Research Bulletin*, 2022, **154**, 111942.
7. T. S. Qin, Y. Y. Ding, R. F. Zhang, X. P. Gao, Z. H. Tang, Y. G. Liu and D. Q. Gao, *Flatchem*, 2022, **32**, 100343.
8. L. H. Xu, K. K. Lu, J. J. Li and D. Shan, *Chemcatchem*, 2020, **12**, 3082-3087.
9. W. Wang, L. Q. Li, J. Ouyang, J. L. Gong, J. Tian, L. Chen, J. L. Huang, B. H. He and Z. H. Hou, *Chinese Chemical Letters*, 2023, **34**, 107597.
10. X. Liu, Z. H. Yin, M. Cui, L. G. Gao, A. M. Liu, W. N. Su, S. R. Chen, T. L. Mac and Y. Q. Li, *Journal of Colloid and Interface Science*, 2022, **610**, 653-662.
11. X. J. Shi, B. B. He, L. Zhao, Y. S. Gong, R. Wang and H. W. Wang, *Journal of Power Sources*, 2021, **482**, 228955.
12. K. Y. Hung, S. Hosseini, T. E. Ko, C. M. Tseng and Y. Y. Li, *Fuel*, 2022, **316**, 123328.
13. W. W. Zhao, P. Bothra, Z. Y. Lu, Y. B. Li, L. P. Mei, K. Liu, Z. H. Zhao, G. X. Chen, S. Back, S. Siahrostami, A. Kulkarni, J. K. Norskov, M. Bajdich and Y. Cui, *Acs Applied Energy Materials*, 2019, **2**, 8605-8614.
14. J. W. Hu, D. Y. Wu, C. Zhu, C. Hao, C. C. Xin, J. W. Zhang, J. Y. Guo, N. N. Li, G. F. Zhang and Y. T. Shi, *Nano Energy*, 2020, **72**, 104670.
15. W. J. Zhang, K. C. Fan, C. H. Chuang, P. R. Liu, J. Zhao, D. C. Qi, L. B. Zong and L. Wang, *Journal of Energy Chemistry*, 2021, **61**, 612-621.
16. Y. Zhan, S. Z. Yu, S. H. Luo, J. Feng and Q. Wang, *Acs Applied Materials & Interfaces*, 2021, **13**, 17658-17667.
17. L. Guo, J. Deng, G. Wang, Y. Hao, K. Bi, X. Wang and Y. Yang, *Advanced Functional Materials*, 2018, **28**, 1804540.
18. C. Yang, Y. X. Chang, H. Y. Kang, Y. R. Li, M. M. Yan and S. L. Xu, *Applied Physics a-Materials Science & Processing*, 2021, **127**, 465.
19. Y. Zhu, L. F. Song, N. Song, M. X. Li, C. Wang and X. F. Lu, *Acs Sustainable Chemistry & Engineering*, 2019, **7**, 2899-2905.
20. Q. Ma, R. F. Liao, Y. H. Lu, S. H. Liu, Y. C. Tang, Y. L. Zhu and D. C. Wu, *Chemistry-an Asian Journal*, 2021, **16**, 3102-3106.

21. F. Luan, S. Zhang, D. D. Chen, K. Zheng and X. M. Zhuang, *Talanta*, 2018, **182**, 529-535.
22. B. H. Chen, Z. Q. Jiang, L. S. Zhou, B. L. Deng, Z. J. Jiang, J. L. Huang and M. L. Liu, *Journal of Power Sources*, 2018, **389**, 178-187.
23. W. Yang, Z. G. Chen and H. M. Li, *International Journal of Electrochemical Science*, 2020, **15**, 1169-1186.
24. A. Samanta and C. R. Raj, *Chemelectrochem*, 2020, **7**, 2877-2887.
25. R. Nivetha, P. Kollu, K. Chandar, S. Pitchaimuthu, S. K. Jeong and A. N. Grace, *Rsc Advances*, 2019, **9**, 3215-3223.
26. J. H. Cao, C. J. Lei, B. Yang, Z. J. Li, L. C. Lei, Y. Hou and X. L. Feng, *Batteries & Supercaps*, 2019, **2**, 348-354.
